# Supplementary material
Source: publisher site journal article supplement (https://www.dovepress.com/article/602814)
Supplement: Supplementary file 1 [file 602814%20suppl_1.docx]

# Supplementary Table S1. Ten Most Frequent HPV Genotypes Identified in the Study Population (n = 303)

| **HPV Genotype** | **Frequency (n)** | **Prevalence (%)** | **95% CI** |
| --- | --- | --- | --- |
| HPV-16 | 52 | 17.2 | 13.2–21.9 |
| HPV-53 | 44 | 14.5 | 10.8–18.9 |
| HPV-6 | 39 | 12.9 | 9.3–17.1 |
| HPV-52 | 31 | 10.2 | 7.0–14.2 |
| HPV-18 | 28 | 9.2 | 6.2–13.0 |
| HPV-31 | 24 | 7.9 | 5.1–11.5 |
| HPV-66 | 21 | 6.9 | 4.3–10.4 |
| HPV-11 | 19 | 6.3 | 3.8–9.6 |
| HPV-58 | 17 | 5.6 | 3.3–8.8 |
| HPV-39 | 15 | 5.0 | 2.8–8.0 |
| Confidence intervals were calculated using the Wilson score method. | | | |

# Supplementary Table S2. Distribution of HSV-2 and EBV According to Cytological Diagnosis

| **Cytology Category** | **HSV-2 Positive n (%)** | **EBV Positive n (%)** |
| --- | --- | --- |
| Normal cytology | 4 (2.5) | 3 (1.9) |
| ASC-US | 3 (8.3) | 2 (5.6) |
| LSIL | 2 (10.0) | 2 (10.0) |
| HSIL | 1 (12.5) | 1 (12.5) |
| No statistically significant association was identified between herpesvirus positivity and cytological category (Fisher’s Exact Test, p > 0.05). | | |
